# Supplementary material for: Genomic Machine Learning Model Predicts Radiation Therapy Benefit in Early-Stage Breast Cancer Patients with High Accuracy
Source: Research Square preprint supplement (doi:10.21203/rs.3.rs-1209026/v2), 2022-02-10
Supplement: Supplementary file 1 [file aae998aedda945fe14ed7719.docx]

Supplementary R Code

# Load packages

library(janitor)
library(dplyr)
library(caret)

# Create dataset

#limit to stages 1 & 2, having surgery but no chemotherapy

metaclinicalfinal <- metaclinical %>% filter((metaclinical$tumor_stage == 1 | metaclinical$tumor_stage == 2) & (metaclinical$type_of_breast_surgery == "BREAST CONSERVING" | metaclinical$type_of_breast_surgery == "MASTECTOMY") & (metaclinical$chemotherapy == "NO"))

#Merge clinical with genomic data

subset <- metaclinicalfinal %>% select(patient_id, relapse_free_status2, radio_therapy) %>% filter(radio_therapy == "YES")
metamerge <- merge(metagene, subset, by = "patient_id")
metamerge <- subset(metamerge, select = -c(patient_id, radio_therapy))

# Wilcoxon Signed Rank test

pValuesall.wilcox <- apply(metamerge[,1:24369], 2, function(x) wilcox.test(x[1:292],x[293:461])$p.value) #rows 1-292 and 293-461 split patients with and without a recurrence
pValuesall.wilcox <- as.data.frame(pValuesall.wilcox)
reduce <- pValuesall.wilcox %>% filter(pValues < 0.05) #filter by p<0.05

# Cox Proportional Hazards

cox_models <- lapply(metamerge[,1:24369], function(x){coxph(Surv(relapse_free_status_months, relapse_free_status3) ~ x,data=metamerge)}) #variable relapse_free_status_months must be added back to the df

pValues <- sapply(1:length(cox_models), function(x) {summary(cox_models[[x]])$coefficients[5]})
HR <- sapply(1:length(cox_models), function(x) {summary(cox_models[[x]])$coefficients[2]})
CI <- sapply(1:length(cox_models), function(x) {exp(confint(cox_models[[x]]))})
genes <- colnames(metagene[,3:24370])

cox_allgene_pvals <- rbind(genes,HR,pValues,CI)
cox_allgene_pvals <- as.data.frame(t(cox_allgene_pvals))
reduce <- cox_allgene_pvals %>% filter(pValues < 0.05) #filter by p<0.05

# Create random sets of insignifant genes

set.seed(100)
insigsubset <- df[,sample(ncol(df), 1595)]

# Run Support Vector Machine

set.seed(123)
cox.df.all_split <- createDataPartition(cox.df.all$relapse_free_status2, p = .8,
 list = FALSE,
 times = 1)
train <- cox.df.all[ cox.df.all_split,]
test <- cox.df.all[-cox.df.all_split,]

svmall <- train(relapse_free_status2 ~ ., data = train,
 method = "svmLinear",
 trControl = trainControl(## 10-fold Cross validation
 method = "cv",
 number = 10 ))
svmall

test$relapse_free_status2 <- factor(test$relapse_free_status2, levels = c("DiseaseFree", "Recurred/Progressed"))
test_pred <- predict(svmall, newdata = test)
confusionMatrix(test_pred, test$relapse_free_status2)

# Tune cost hyperparameter for SVM

set.seed(123)

df2_split <- createDataPartition(df2$relapse_free_status2, p = .8,
 list = FALSE,
 times = 1)
train <- df2[ df2_split,]
test <- df2[-df2_split,]

svmall <- train(relapse_free_status2 ~ ., data = train,
 method = "svmLinear",
 trControl = trainControl(method = "repeatedcv", number = 10, repeats = 3),
 tuneGrid = expand.grid(C = seq(0, 2, length = 20)))

svmall
plot(svmall)
confusionmatrix(svmall, positive = "Recurred/Progressed" )

# Run Neural Networks

set.seed(123)
df2_split <- createDataPartition(df2$relapse_free_status2, p = .8,
 list = FALSE,
 times = 1)
train <- df2[ df2_split,]
test <- df2[-df2_split,]

nnetall <- train(relapse_free_status2 ~ ., data = train,
 method = "nnet",
 trControl = trainControl(## 10-fold CV
 method = "cv",
 number = 10),
 ## repeated ten times
 MaxNWts=5000)

nnetall

test$relapse_free_status2 <- factor(test$relapse_free_status2, levels = c("DiseaseFree", "Recurred/Progressed"))
test_pred <- predict(nnetall, newdata = test)
confusionMatrix(test_pred, test$relapse_free_status2)

# Tune decay for Neural Networks

set.seed(123)
df2_split <- createDataPartition(df2$relapse_free_status2, p = .8,
 list = FALSE,
 times = 1)
train <- df2[ df2_split,]
test <- df2[-df2_split,]

NN <- train(relapse_free_status2 ~ ., data = train,
 method = "nnet",
 trControl = trainControl(method = "cv", number = 10),
 tuneGrid = expand.grid(size = 3, decay = seq(0.1, 2.5, length = 10)) ,
 MaxNWts=5000)

NN

test_pred <- predict(NN, newdata = test)
confusionMatrix(test_pred, test$relapse_free_status2)

# Test model on RT-untreated patients

dfneg_pred <- predict(nnetall, newdata = dfneg)
confusionMatrix(dfneg_pred, dfneg$relapse_free_status2)

# Recursive Feature Elimination

fs <- df2[,1:1596] #subset set of features

rfe_control = rfeControl(
 method="cv",
 number=10)

fit_control = trainControl(classProbs=F,
 search="random")

relapse <- as.factor(ifelse(df2$relapse_free_status2 == "DiseaseFree", "No", "Yes")) #code outcome variable

rfe_fit = rfe(fs, relapse,
 sizes = c(10,20,30,40,50,60,70,80,90,100,250,500,750,1000),
 rfeControl = rfe_control,
 method="svmLinear",
 trControl=fit_control)


trellis.par.set(caretTheme())
plot(rfe_fit, type = c("g", "o")

# Build final Support Vector Machine model with 1596 genes, cost = 1

set.seed(123)
df2_split <- createDataPartition(df2$relapse_free_status2, p = .8,
 list = FALSE,
 times = 1)
train <- df2[ df2_split,]
test <- df2[-df2_split,]

SVM1596 <- train(relapse_free_status2 ~ ., data = train,
 method = "svmLinear",
 trControl = trainControl(method = "repeatedcv", number = 10, repeats = 3, summaryFunction=twoClassSummary, classProbs=T, savePredictions = T), #for plotting of AUROC curves
 tuneGrid = expand.grid(C=1))


SVM1596

test$relapse_free_status2 <- factor(test$relapse_free_status2, levels = c("Recurred.Progressed", "DiseaseFree"))
test_pred <- predict(SVM1596, newdata = test)
confusionMatrix(test_pred, test$relapse_free_status2)

# Comparison of all models

mods <- resamples(list(SVM977 = SVM977, SVM1596 = SVM1596, NN977 = NN977, NN1596 = NN1596))
summary(mods)
bwplot(mods) #box plots of models
diffs <- diff(mods) # difference in model predictions
summary(diffs) # summarize p-values for pair-wise comparisons

# Gene Set Enrichment analysis

if (!requireNamespace("BiocManager", quietly=TRUE))
+ install.packages("BiocManager")
BiocManager::install("topGO")

if (!requireNamespace("BiocManager", quietly=TRUE))
+ install.packages("BiocManager")
BiocManager::install(c("KEGGREST", "org.Hs.eg.db", "Rgraphviz"))

library(topGO)
library(KEGGREST)
library(org.Hs.eg.db)
library(Rgraphviz)

cox_gene_pvals <- read.csv("cox_gene_pvals.csv", header=T, row.names=1)
reduce <- cox_gene_pvals %>% filter(pValues < 0.05)
geneList <- reduce$pValues
names(geneList) <- reduce$genes

# Mapping all 977 genes to biological process
GOdata <- new('topGOdata',
 ontology = "BP", #character string specifying the ontology of interest (BP, MF or CC)
 allGenes = geneList, #named vector of type numeric or factor. The names attribute contains the genes identifiers. The
#genes listed in this object define the gene universe.
 geneSelectionFun = function(x)x,
 nodeSize = 10, #used to prune the GO hierarchy from the terms which have less than 10 annotated genes
 annot = annFUN.org, mapping = "org.Hs.eg.db", ID = "SYMBOL") #function which maps genes identifiers to GO terms.

resultKS <- runTest(GOdata, algorithm = "weight01", statistic = "ks") # Kolmogorov-Smirnov testing
tab2 <- GenTable(GOdata, raw.p.value = resultKS, topNodes = length(resultKS@score), numChar = 120)

# Overlap with radiogenes

if (!requireNamespace("BiocManager", quietly = TRUE))
 install.packages("BiocManager")

BiocManager::install("org.Hs.eg.db")

library(org.Hs.eg.db)
keytypes(org.Hs.eg.db)
columns(org.Hs.eg.db)
cols <- c( "ENTREZID", "ALIAS", "GENENAME" ,"SYMBOL")

#Search for aliases of radiogenes
radiogenes = litradiogenes$gene #list of radiogenes
search1 <- AnnotationDbi::select(org.Hs.eg.db, keys=radiogenes, columns=cols, keytype="SYMBOL")

#search for aliases of geneset
allgenes = geneset$gene #list of genes
search2 <- AnnotationDbi::select(org.Hs.eg.db, keys=allgenes, columns=cols, keytype="SYMBOL")

#find overlap between aliases
intersect(search1$ALIAS, search2$ALIAS)
length(intersect(search1$ALIAS, search3$ALIAS)) #46

# Timing model performance

ptm <- proc.time()
test_pred <- predict(SVM1596, newdata = test)
confusionMatrix(test_pred, test$relapse_free_status2)
proc.time() - ptm
